# Supplementary material for: Novel phosphorus-doped PbO2–MnO2 bicontinuous electrodes for oxygen evolution reaction
Source: Royal Society of Chemistry journal article supplement (doi:10.1039/c4ra01831a), 2014-01-01

**Electronic Supplementary Information (ESI) for**

**Novel phosphorus-doped PbO<sub>2</sub>-MnO<sub>2</sub> bicontinuous  
electrodes for oxygen evolution reaction**

Yuan Li<sup>a</sup>, Liangxing Jiang<sup>a,\*</sup>, Fangyang Liu<sup>a</sup>, Jie Li<sup>b,\*</sup>, Yexiang Liu<sup>a</sup>

<sup>a</sup> School of Metallurgy and Environment, Central South University, Changsha 410083, P. R. China

<sup>b</sup> National Engineering Laboratory for Efficient Utilization of Refractory Non-ferrous Metals Resources, Changsha 410083, P. R. China

**Corresponding author:**

\* E-mail: [lxjiang@csu.edu.cn](mailto:lxjiang@csu.edu.cn) (Liangxing Jiang)

\* E-mail: [csulijie@126.com](mailto:csulijie@126.com) (Jie Li)

**Fig. S1** Low resolution SEM images showing the surface morphology of the P-(PbO<sub>2</sub>-MnO<sub>2</sub>) deposits obtained by adding (a) 0.01 g L<sup>-1</sup>, (b) 0.03g L<sup>-1</sup>, (c) 0.05 g L<sup>-1</sup> Mn<sup>2+</sup> (in the form of Mn(NO<sub>3</sub>)<sub>2</sub>) in the basic deposition solution.

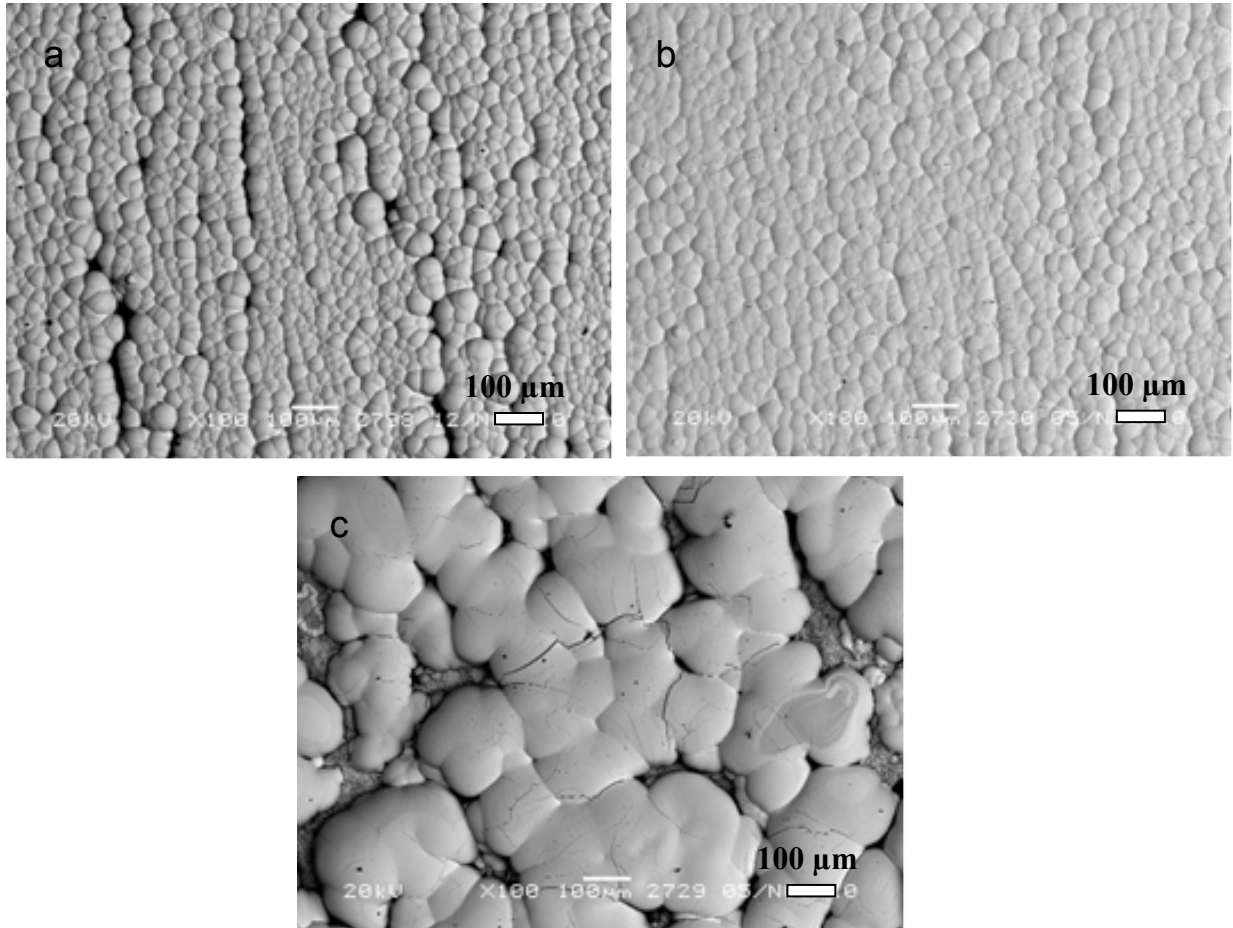

**Fig. S2** Low resolution SEM images showing the surface morphologies of (P-PbO<sub>2</sub>)-MnO<sub>2</sub> deposits obtained by adding (a) 1 g L<sup>-1</sup> and (b) 20 g L<sup>-1</sup> MnO<sub>2</sub> particle in the basic deposition solution (corresponding MnO<sub>2</sub> content in deposit: (a) 1.78 wt.%, (b) 8.17 wt.%).

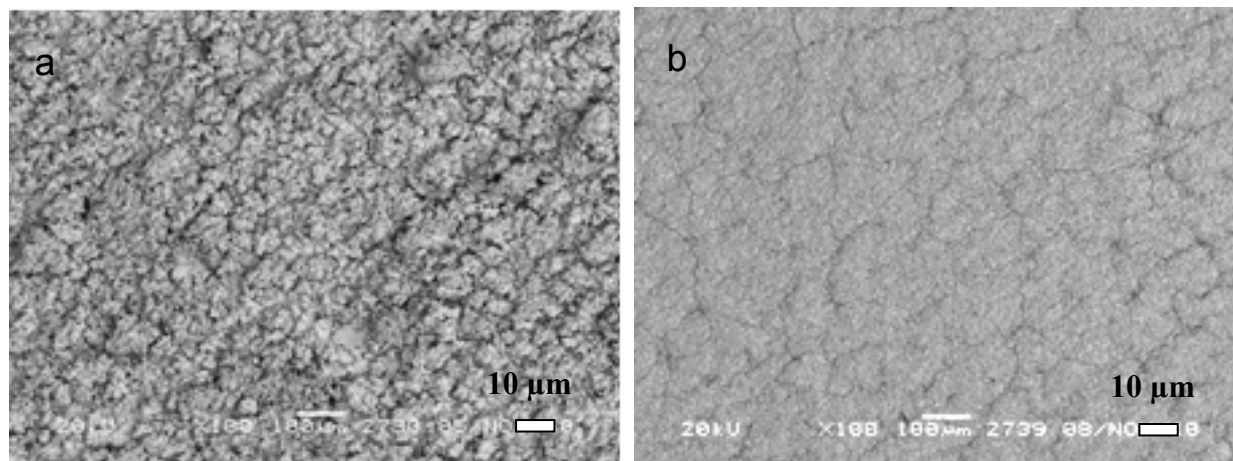

**Fig. S3** SEM back-scattered electron images showing the contrast difference of  $\text{PbO}_2$  matrix and  $\text{MnO}_2$  particles in the (P- $\text{PbO}_2$ )- $\text{MnO}_2$  bicontinuous electrode. Exposed  $\text{MnO}_2$  particles were representatively marked with red arrows.

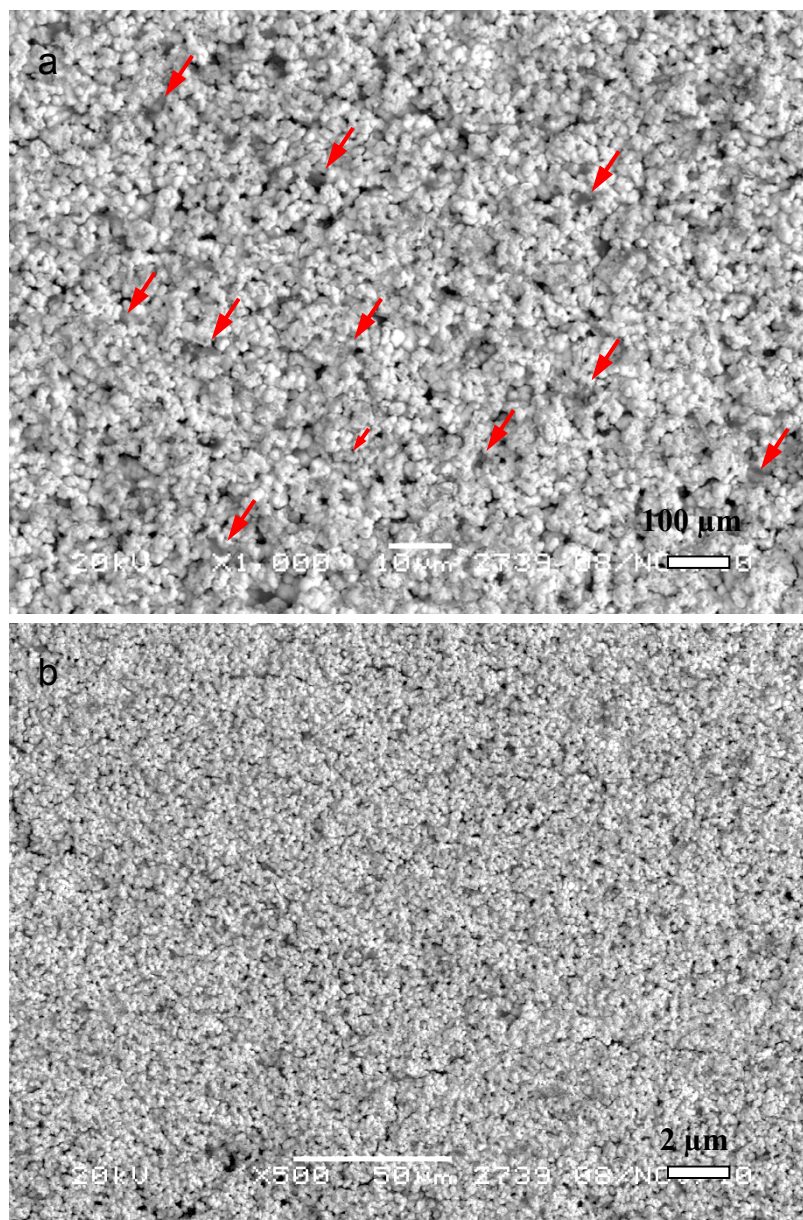

**Fig. S4** XRD spectra of the as-produced P-PbO<sub>2</sub>, P-(PbO<sub>2</sub>-MnO<sub>2</sub>), and (P-PbO<sub>2</sub>)-MnO<sub>2</sub> deposit. The P-(PbO<sub>2</sub>-MnO<sub>2</sub>) deposit corresponds to Fig. 3b with a MnO<sub>2</sub> content of 0.60 wt.%. The (P-PbO<sub>2</sub>)-MnO<sub>2</sub> deposit corresponds to Fig. 3e and f with a MnO<sub>2</sub> content of 8.17 wt.%.

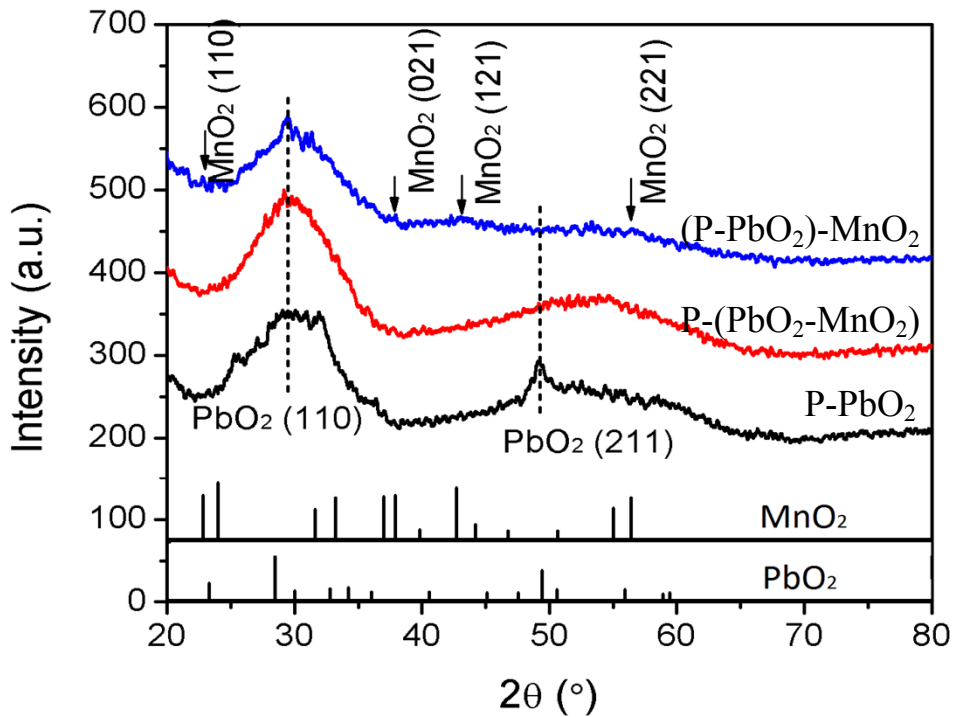

**Fig. S5** Nyquist spectra of the stabilized (a) P-PbO<sub>2</sub>, (b) P-(PbO<sub>2</sub>-MnO<sub>2</sub>), and (c) (P-PbO<sub>2</sub>)-MnO<sub>2</sub> composite anodes at various anodic potentials. This shows the small capacitive arcs in the high frequency region in Fig. 6b.

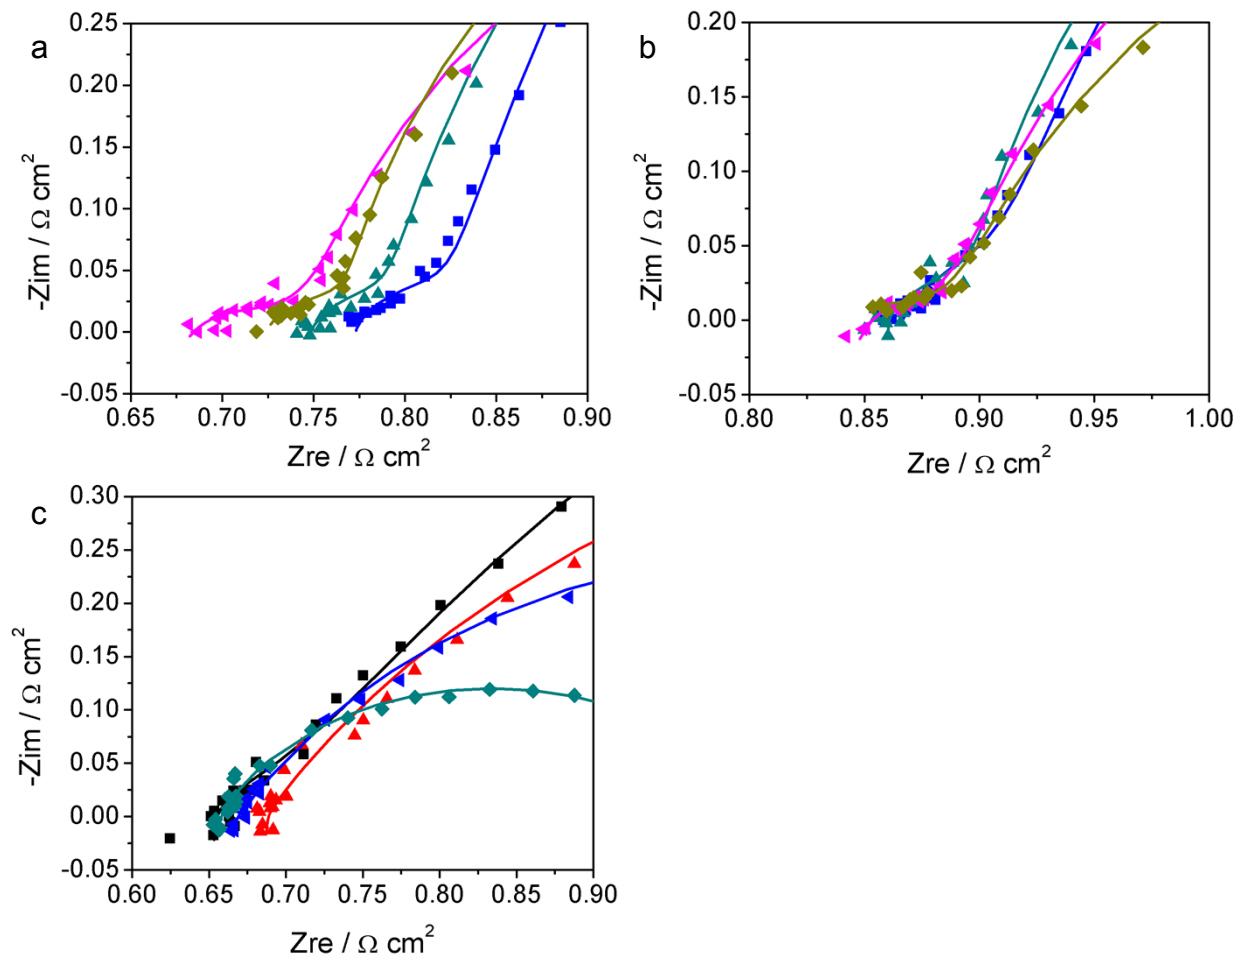

Supplement: c4ra01831a1.pdf [file c4ra01831a1.pdf]
